# Supplementary material for: Copper(ii) triflate-catalyzed reactions for the synthesis of novel and diverse quinoline carboxylates
Source: Royal Society of Chemistry journal article supplement (doi:10.1039/c3ra44943b), 2013-01-01

## Electronic Supplementary Information (ESI)

### Copper(II) triflate-catalyzed reactions for the synthesis of novel and diverse quinoline carboxylates

Rameshwar Prasad Pandit and Yong Rok Lee\*

School of Chemical Engineering, Yeungnam University, Gyeongsan 712-749, Republic of Korea

[yrlee@yu.ac.kr](mailto:yrlee@yu.ac.kr)

Phone: 82-53-810-2529. Fax: 82-53-810-4631

#### Contents

|     |                                                                            |     |
|-----|----------------------------------------------------------------------------|-----|
| 1.  | Copies of $^1\text{H}$ and $^{13}\text{C}$ NMR of Compound <b>3a</b> ..... | S2  |
| 2.  | Copies of $^1\text{H}$ and $^{13}\text{C}$ NMR of Compound <b>3b</b> ..... | S3  |
| 3.  | Copies of $^1\text{H}$ and $^{13}\text{C}$ NMR of Compound <b>3c</b> ..... | S4  |
| 4.  | Copies of $^1\text{H}$ and $^{13}\text{C}$ NMR of Compound <b>3d</b> ..... | S5  |
| 5.  | Copies of $^1\text{H}$ and $^{13}\text{C}$ NMR of Compound <b>3e</b> ..... | S6  |
| 6.  | Copies of $^1\text{H}$ and $^{13}\text{C}$ NMR of Compound <b>3f</b> ..... | S7  |
| 7.  | Copies of $^1\text{H}$ and $^{13}\text{C}$ NMR of Compound <b>3g</b> ..... | S8  |
| 8.  | Copies of $^1\text{H}$ and $^{13}\text{C}$ NMR of Compound <b>3h</b> ..... | S9  |
| 9.  | Copies of $^1\text{H}$ and $^{13}\text{C}$ NMR of Compound <b>3i</b> ..... | S10 |
| 10. | Copies of $^1\text{H}$ and $^{13}\text{C}$ NMR of Compound <b>3j</b> ..... | S11 |
| 11. | Copies of $^1\text{H}$ and $^{13}\text{C}$ NMR of Compound <b>3k</b> ..... | S12 |
| 12. | Copies of $^1\text{H}$ and $^{13}\text{C}$ NMR of Compound <b>3l</b> ..... | S13 |
| 13. | Copies of $^1\text{H}$ and $^{13}\text{C}$ NMR of Compound <b>3m</b> ..... | S14 |
| 14. | Copies of $^1\text{H}$ and $^{13}\text{C}$ NMR of Compound <b>3n</b> ..... | S15 |
| 15. | Copies of $^1\text{H}$ and $^{13}\text{C}$ NMR of Compound <b>3o</b> ..... | S16 |
| 16. | Copies of $^1\text{H}$ and $^{13}\text{C}$ NMR of Compound <b>3p</b> ..... | S17 |
| 17. | Copies of $^1\text{H}$ and $^{13}\text{C}$ NMR of Compound <b>3q</b> ..... | S18 |
| 18. | Copies of $^1\text{H}$ and $^{13}\text{C}$ NMR of Compound <b>6</b> .....  | S19 |
| 19. | Copies of $^1\text{H}$ and $^{13}\text{C}$ NMR of Compound <b>9</b> .....  | S20 |
| 20. | Copies of $^1\text{H}$ and $^{13}\text{C}$ NMR of Compound <b>10</b> ..... | S21 |
| 21. | Copies of $^1\text{H}$ and $^{13}\text{C}$ NMR of Compound <b>11</b> ..... | S22 |
| 22. | Copies of $^1\text{H}$ and $^{13}\text{C}$ NMR of Compound <b>12</b> ..... | S23 |

<sup>1</sup>H NMR of Compound **3a**

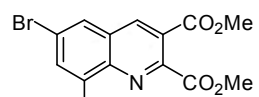

300 MHz, CDCl<sub>3</sub>

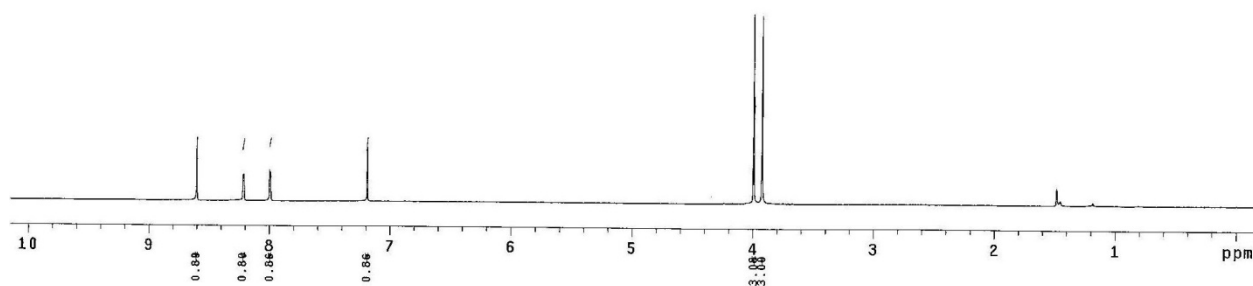

<sup>13</sup>C NMR of Compound **3a**

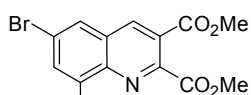

75 MHz, CDCl<sub>3</sub>

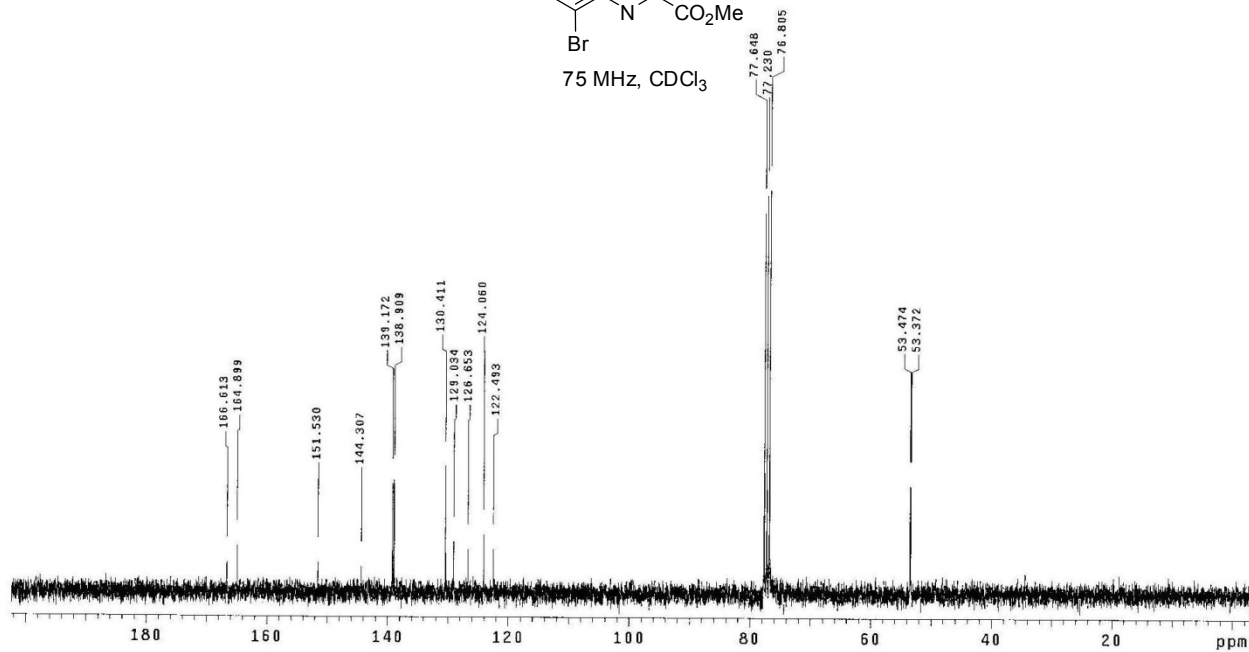

<sup>1</sup>H NMR of Compound **3b**

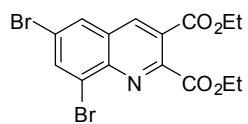

300 MHz, CDCl<sub>3</sub>

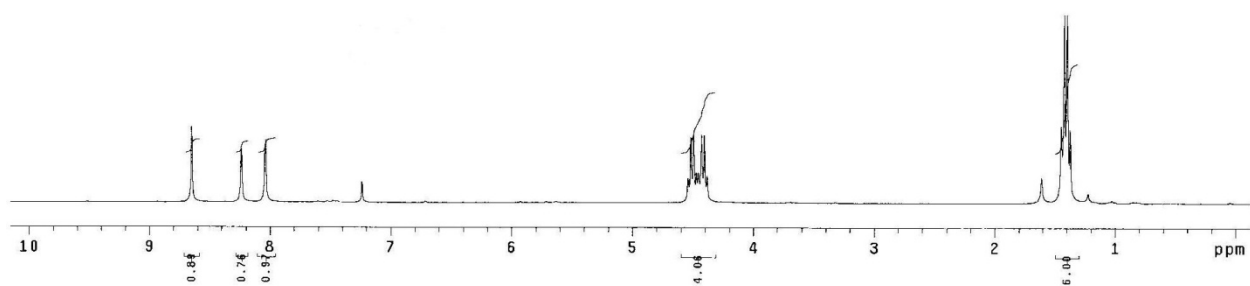

<sup>13</sup>C NMR of Compound **3b**

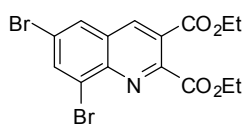

75 MHz, CDCl<sub>3</sub>

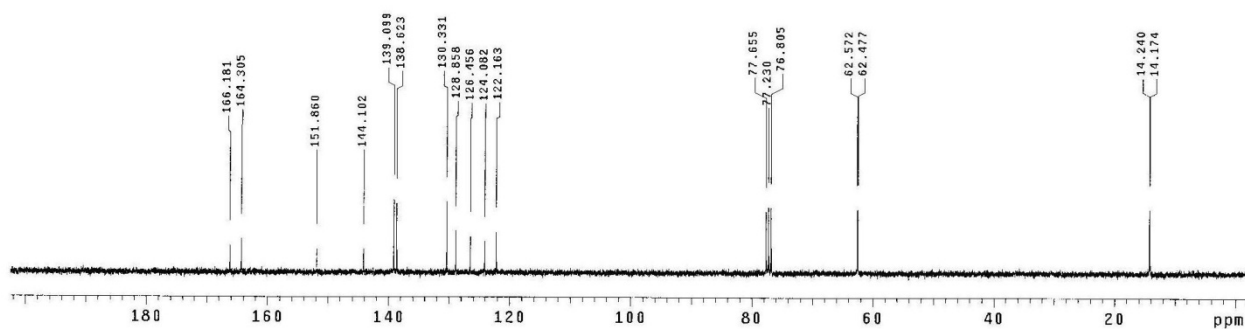

<sup>1</sup>H NMR of Compound **3c**

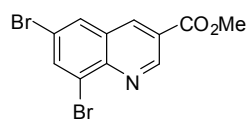

300 MHz, CDCl<sub>3</sub>

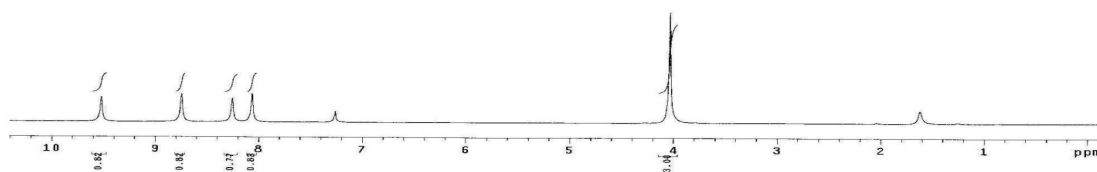

<sup>13</sup>C NMR of Compound **3c**

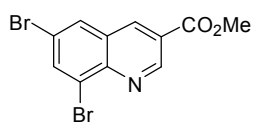

75 MHz, CDCl<sub>3</sub>

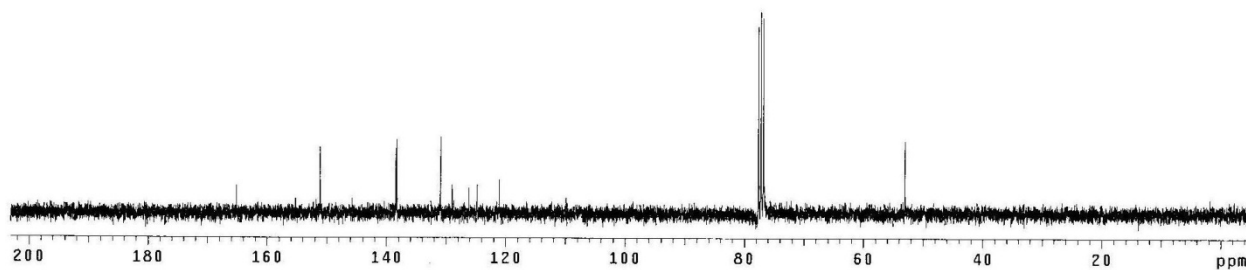

<sup>1</sup>H NMR of Compound 3d

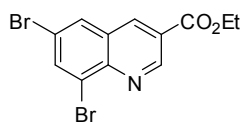

300 MHz, CDCl<sub>3</sub>

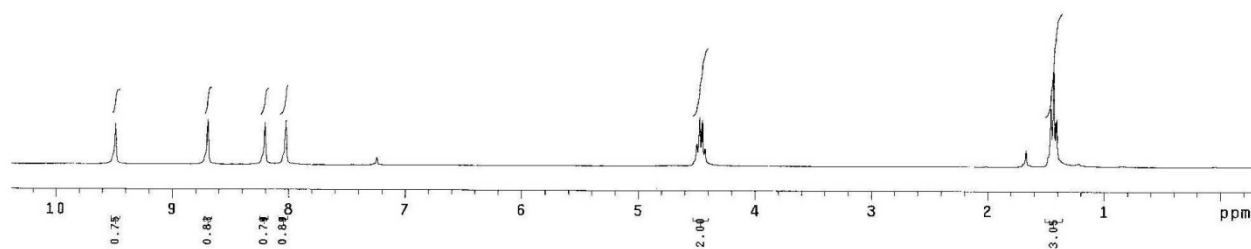

<sup>13</sup>C NMR of Compound 3d

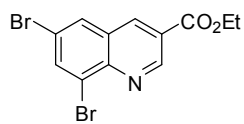

75 MHz, CDCl<sub>3</sub>

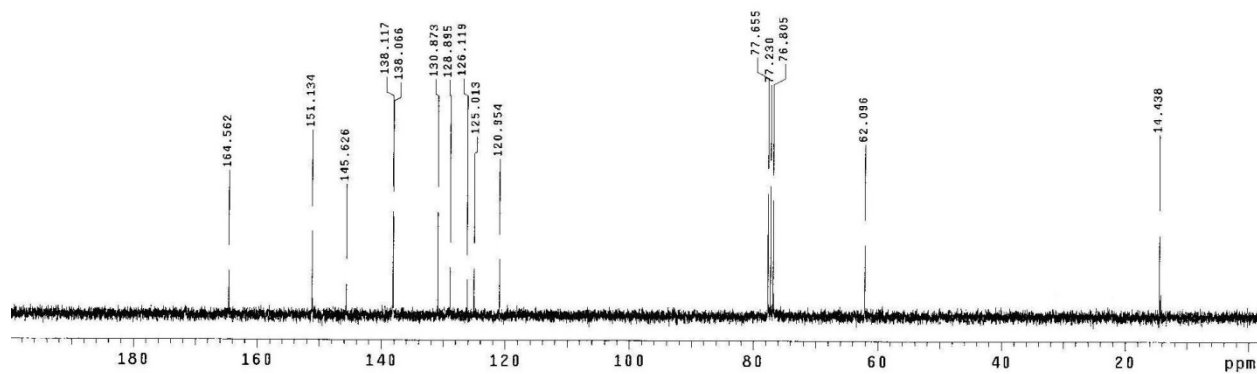

<sup>1</sup>H NMR of Compound **3e**

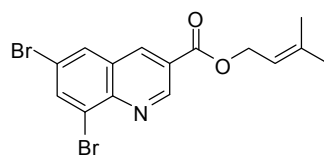

300 MHz, CDCl<sub>3</sub>

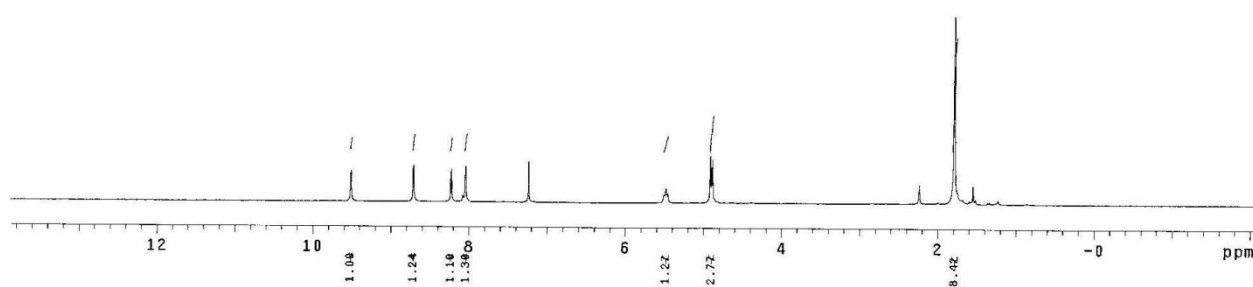

<sup>13</sup>C NMR of Compound **3e**

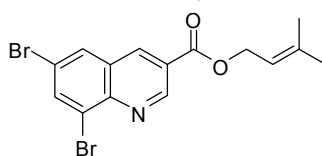

75 MHz, CDCl<sub>3</sub>

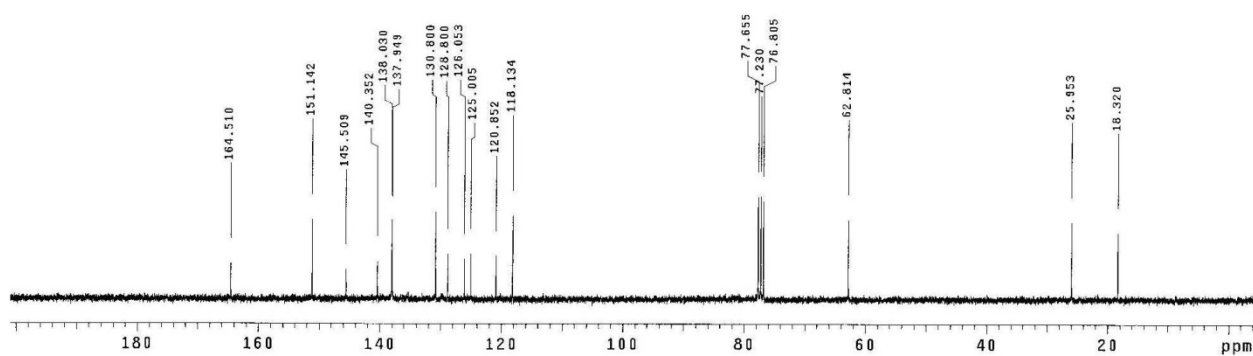

<sup>1</sup>H NMR of Compound 3f

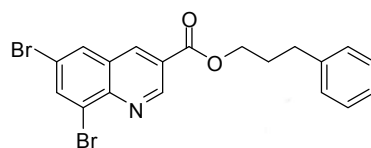

300 MHz, CDCl<sub>3</sub>

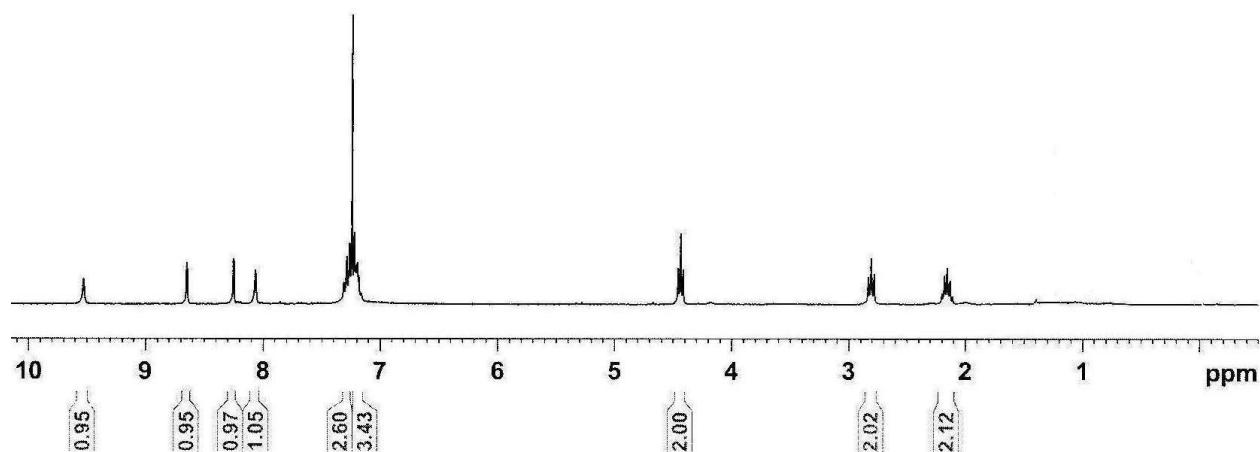

<sup>13</sup>C NMR of Compound 3f

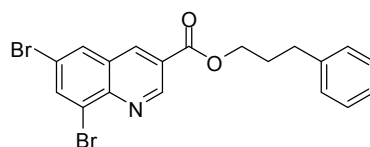

150 MHz, CDCl<sub>3</sub>

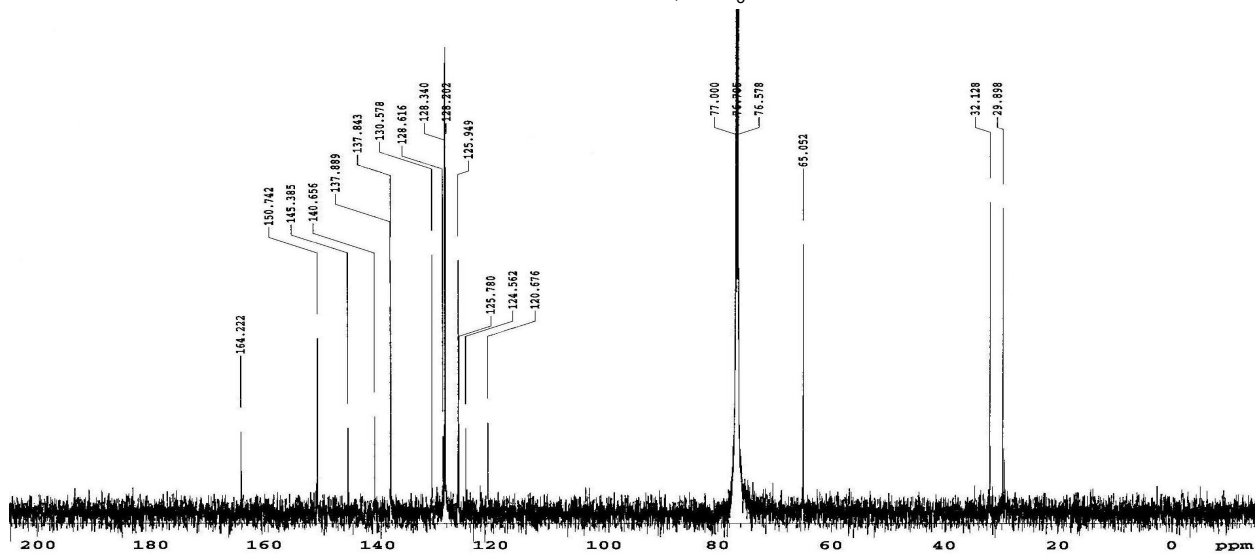

<sup>1</sup>H NMR of Compound 3g

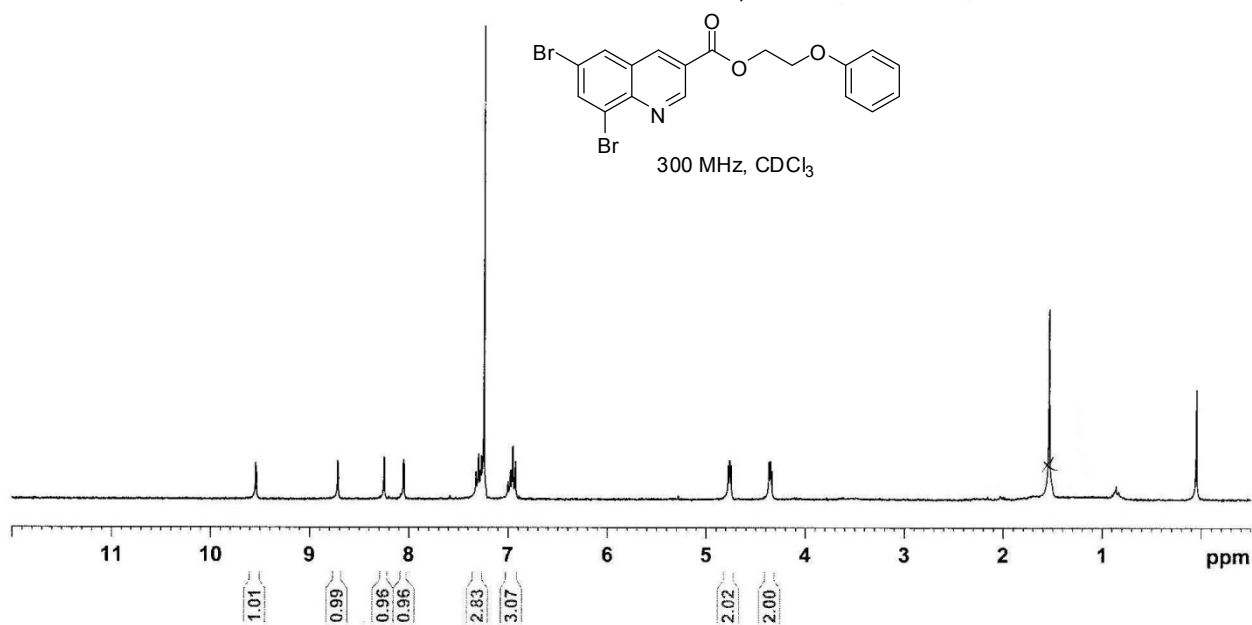

<sup>13</sup>C NMR of Compound 3g

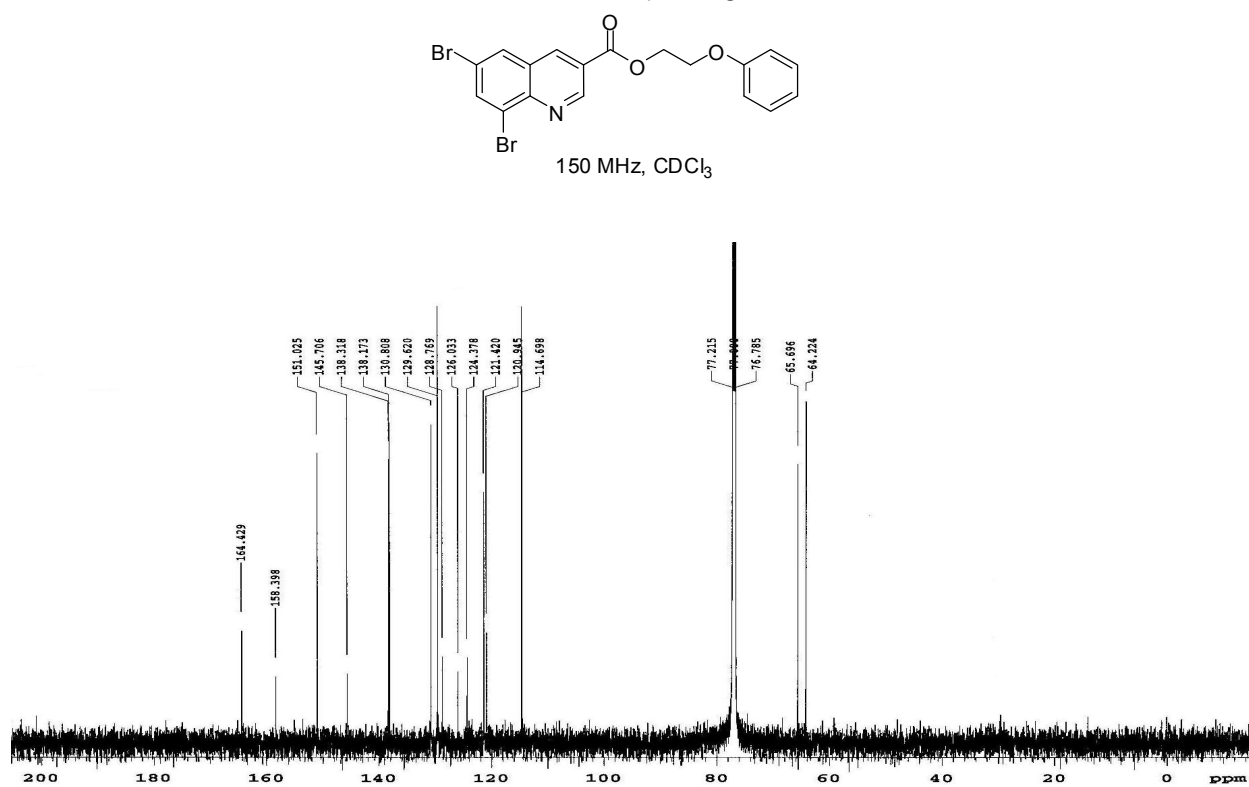



<sup>1</sup>H NMR of Compound 3h

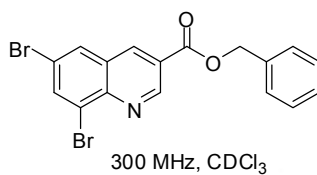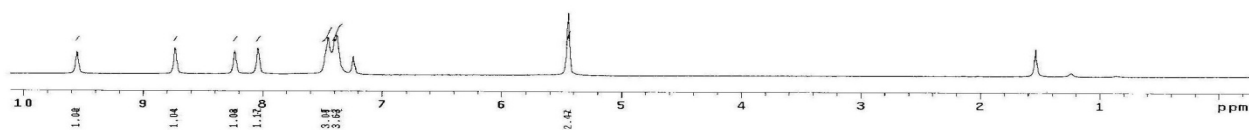

<sup>13</sup>C NMR of Compound 3h

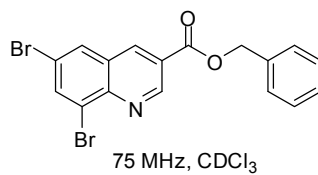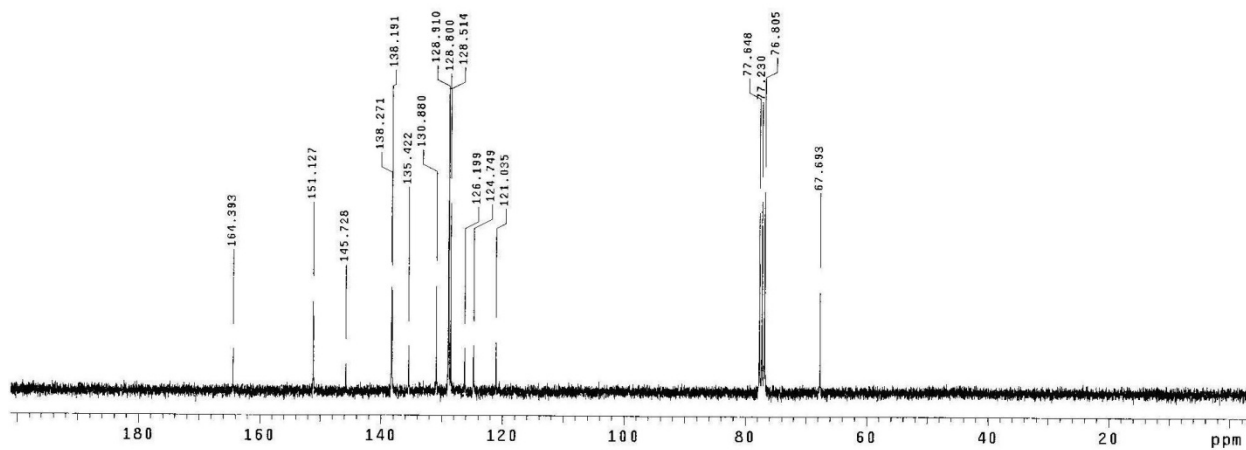

<sup>1</sup>H NMR of Compound 3i

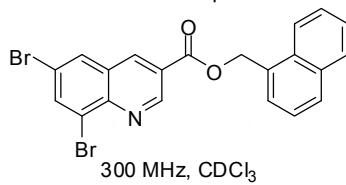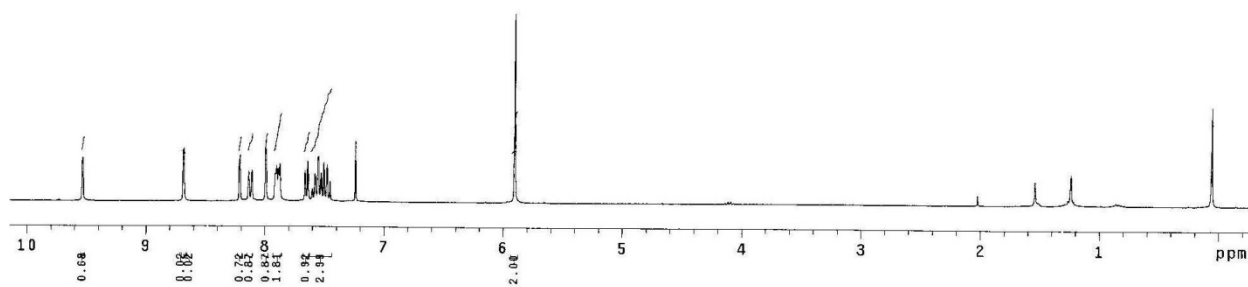

<sup>13</sup>C NMR of Compound 3i

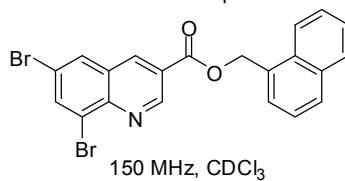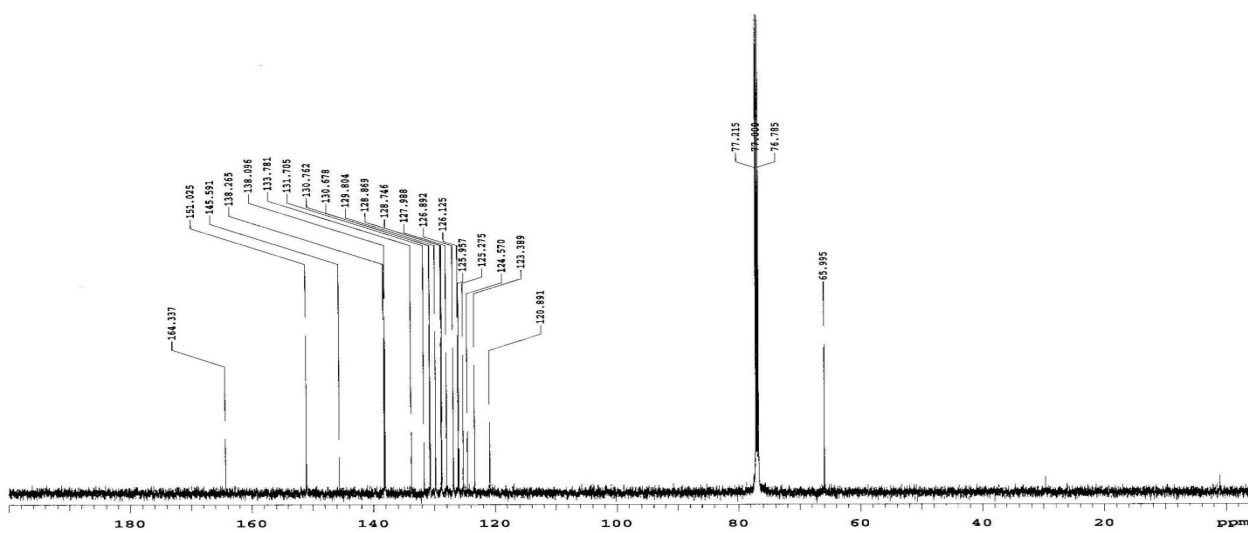

<sup>1</sup>H NMR of Compound **3j**

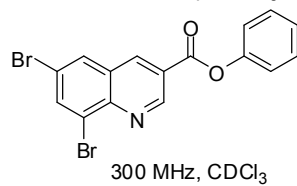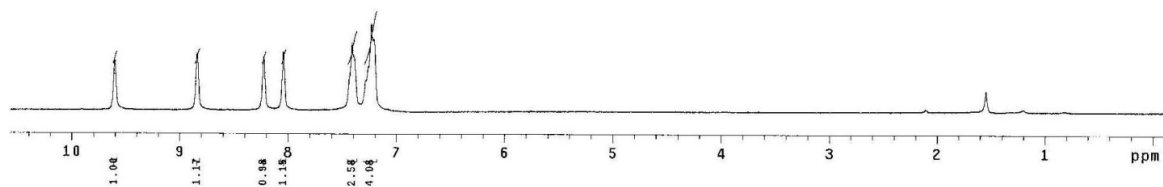

<sup>13</sup>C NMR of Compound **3j**

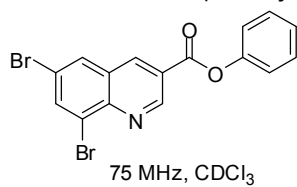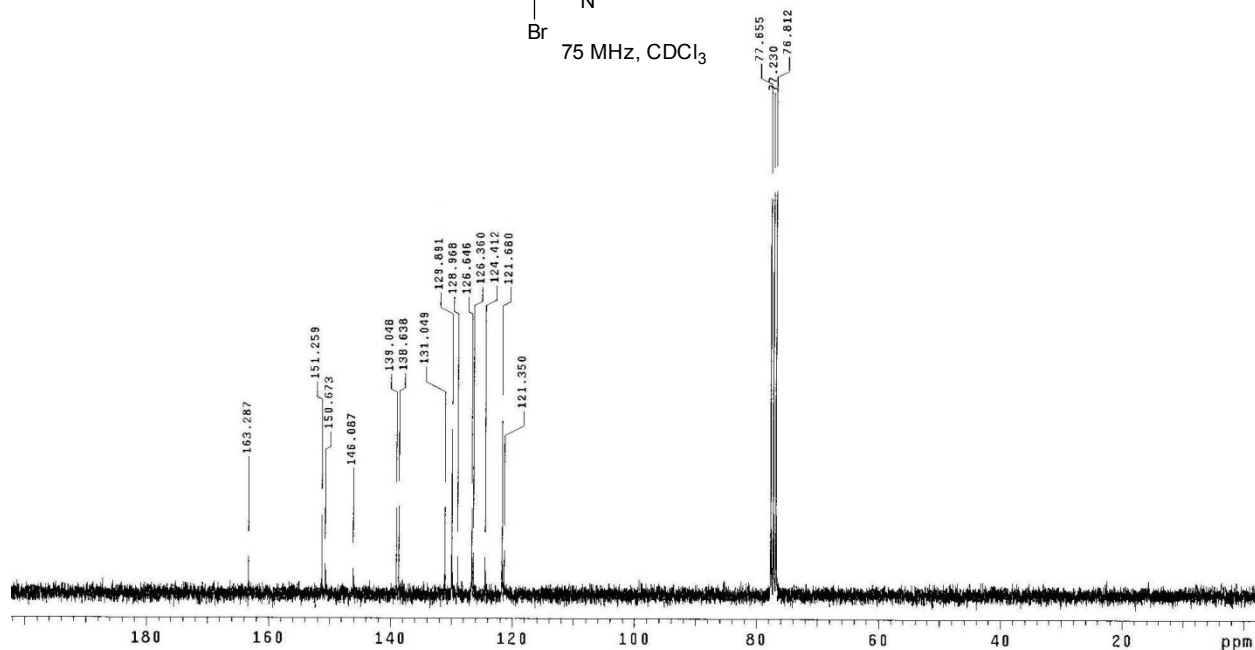

<sup>1</sup>H NMR of Compound **3k**

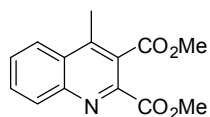

300 MHz, CDCl<sub>3</sub>

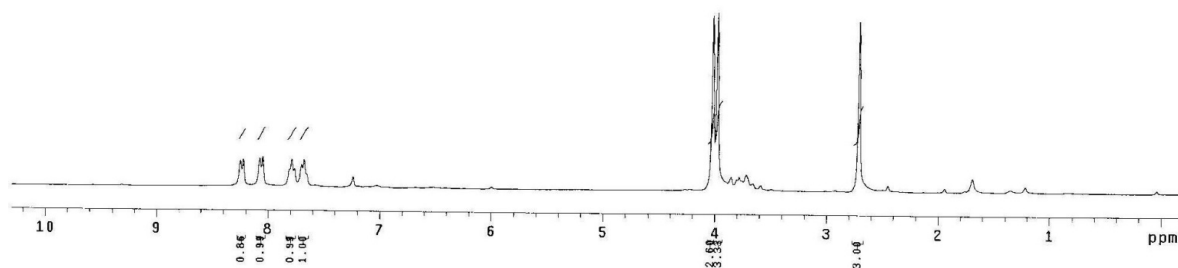

<sup>13</sup>C NMR of Compound **3k**

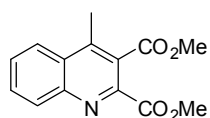

150 MHz, CDCl<sub>3</sub>

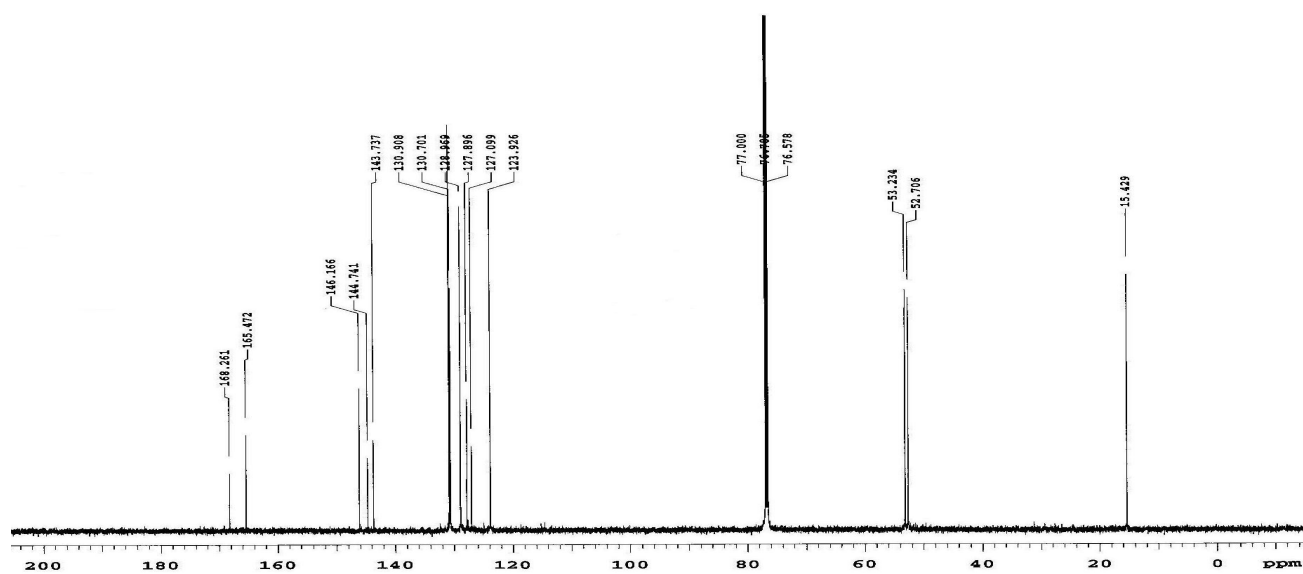

<sup>1</sup>H NMR of Compound **31**

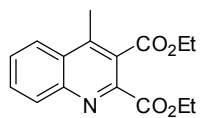

300 MHz, CDCl<sub>3</sub>

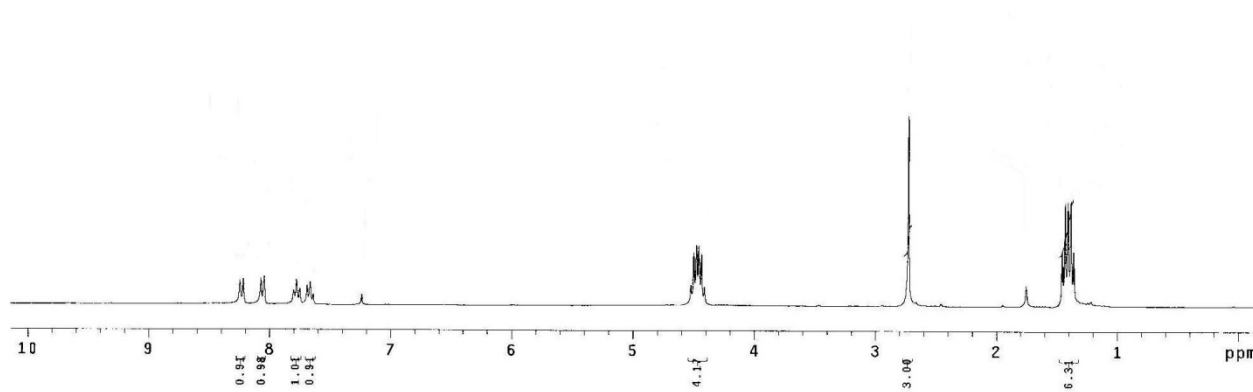

<sup>13</sup>C NMR of Compound **31**

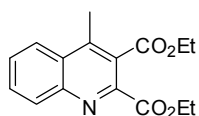

75 MHz, CDCl<sub>3</sub>

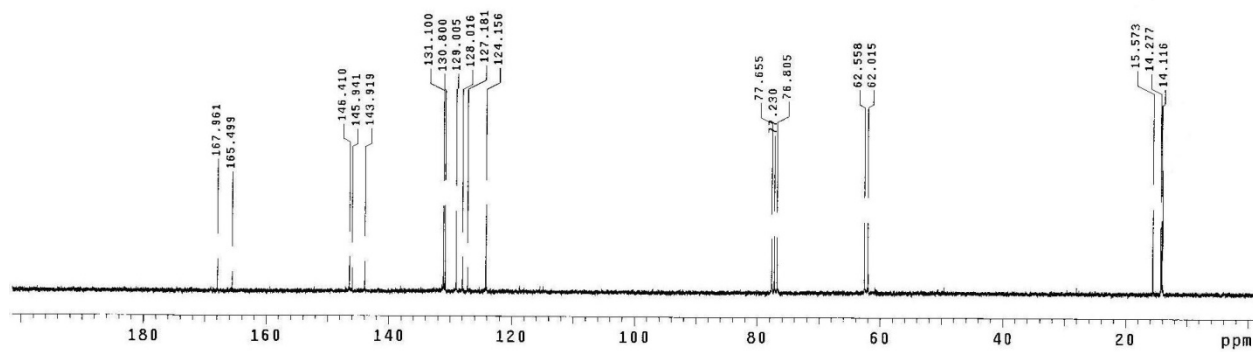

<sup>1</sup>H NMR of Compound **3m**

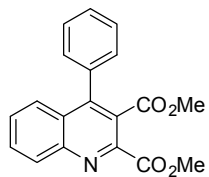

300 MHz, CDCl<sub>3</sub>

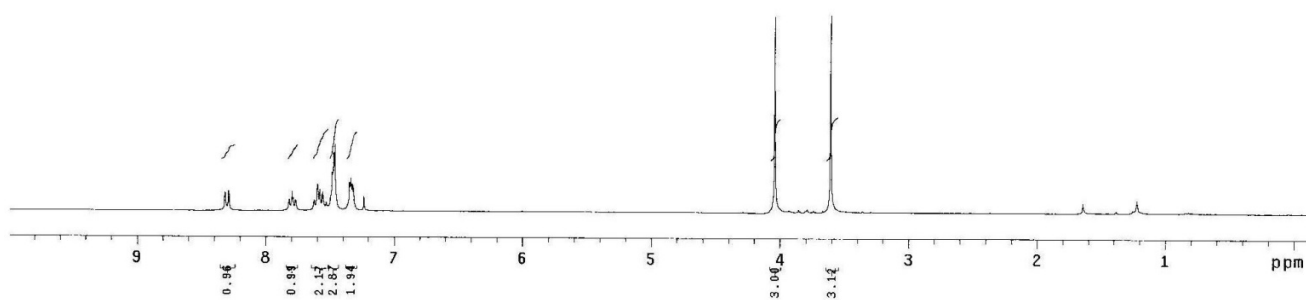

<sup>13</sup>C NMR of Compound **3m**

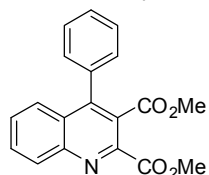

75 MHz, CDCl<sub>3</sub>

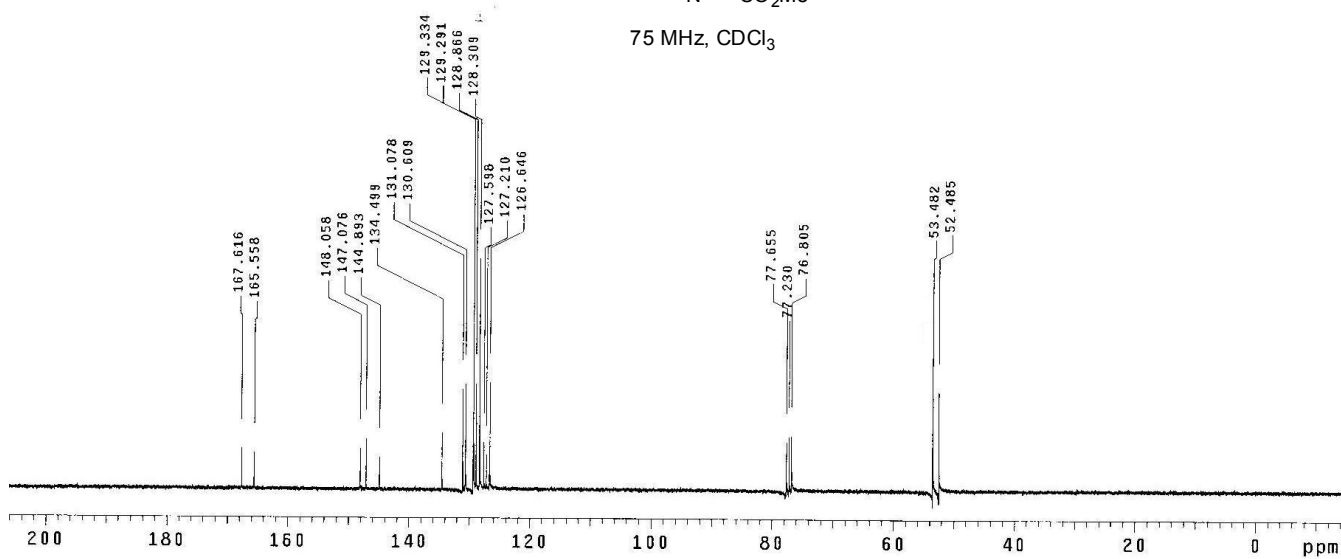

<sup>1</sup>H NMR of Compound **3n**

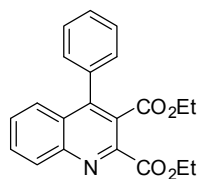

300 MHz, CDCl<sub>3</sub>

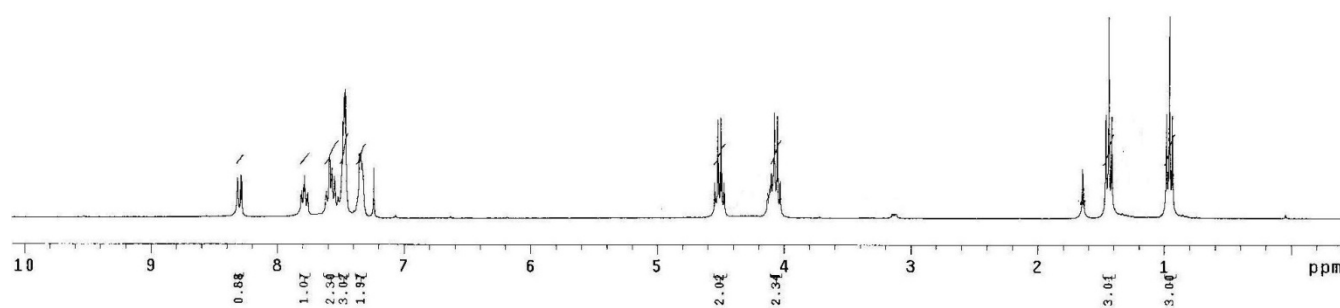

<sup>13</sup>C NMR of Compound **3n**

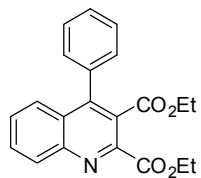

75 MHz, CDCl<sub>3</sub>

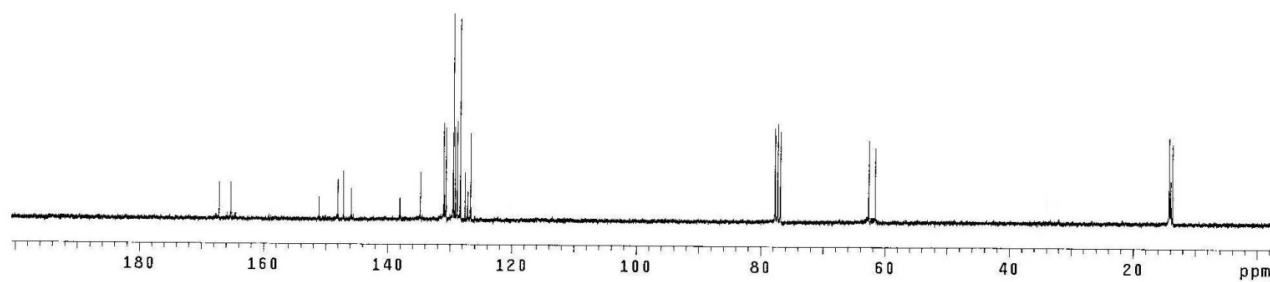

<sup>1</sup>H NMR of Compound **3o**

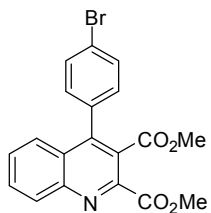

300 MHz, CDCl<sub>3</sub>

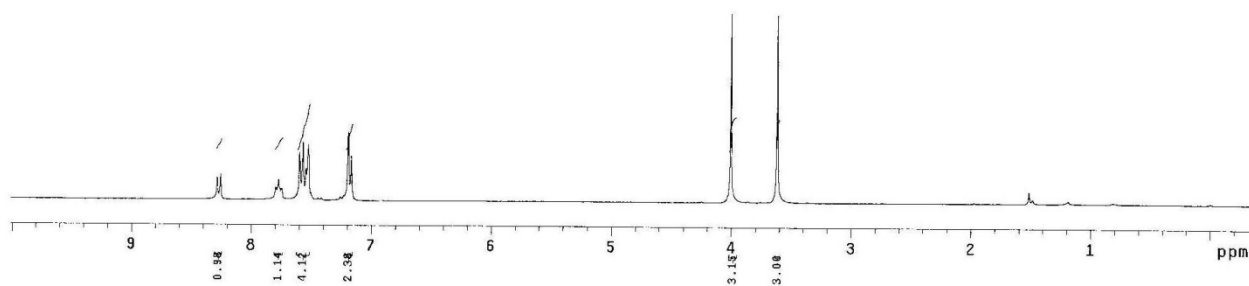

<sup>13</sup>C NMR of Compound **3o**

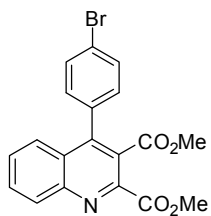

75 MHz, CDCl<sub>3</sub>

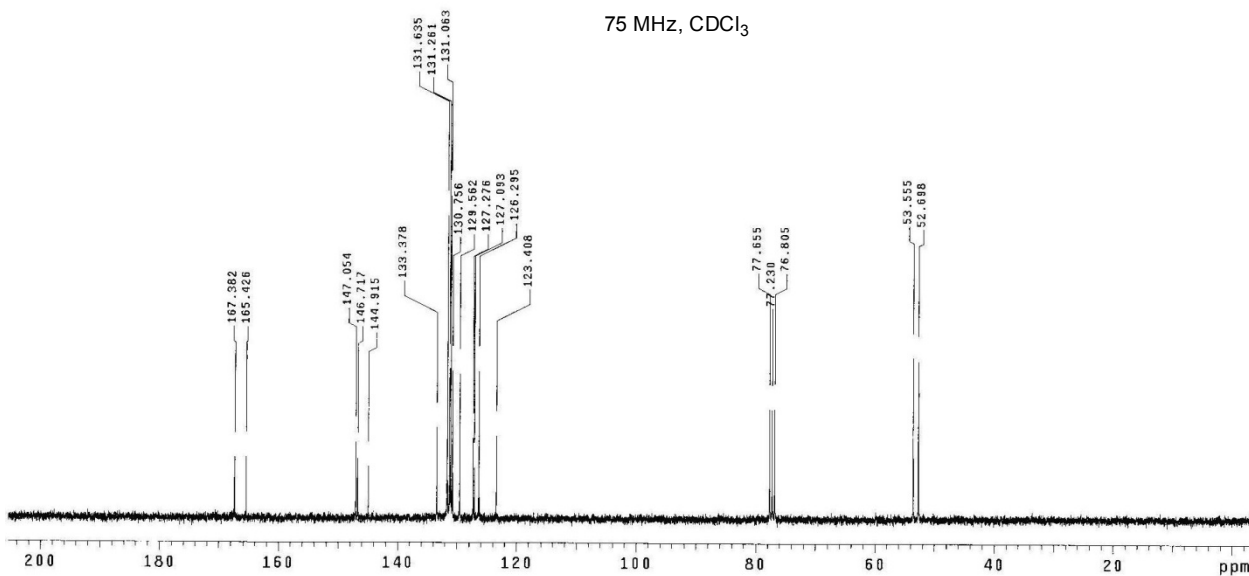



<sup>1</sup>H NMR of Compound 3p

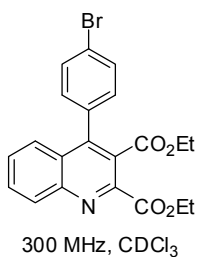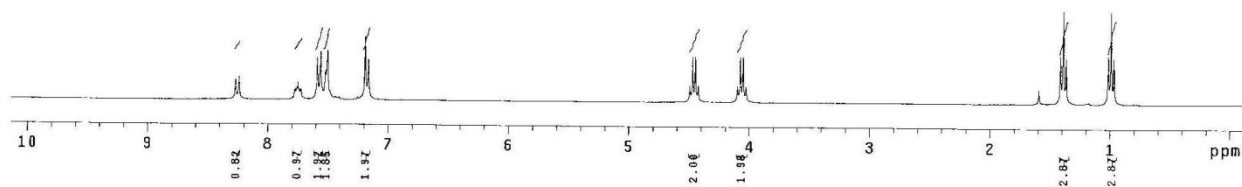

<sup>13</sup>C NMR of Compound 3p

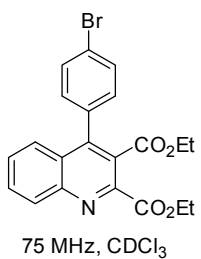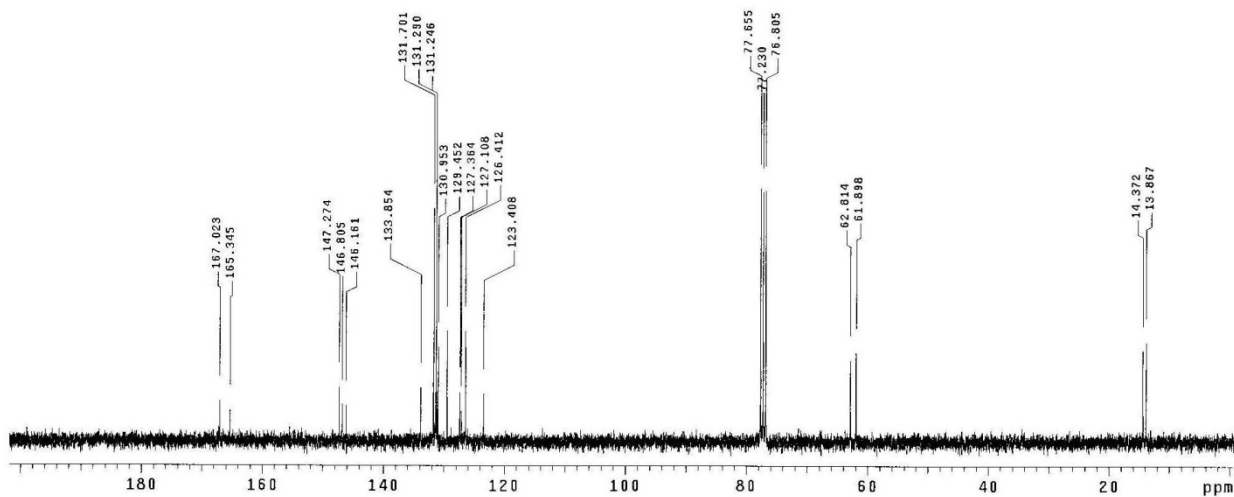

<sup>1</sup>H NMR of Compound **3q**

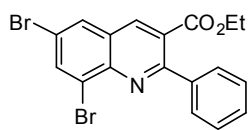

(300 MHz, CDCl<sub>3</sub>)

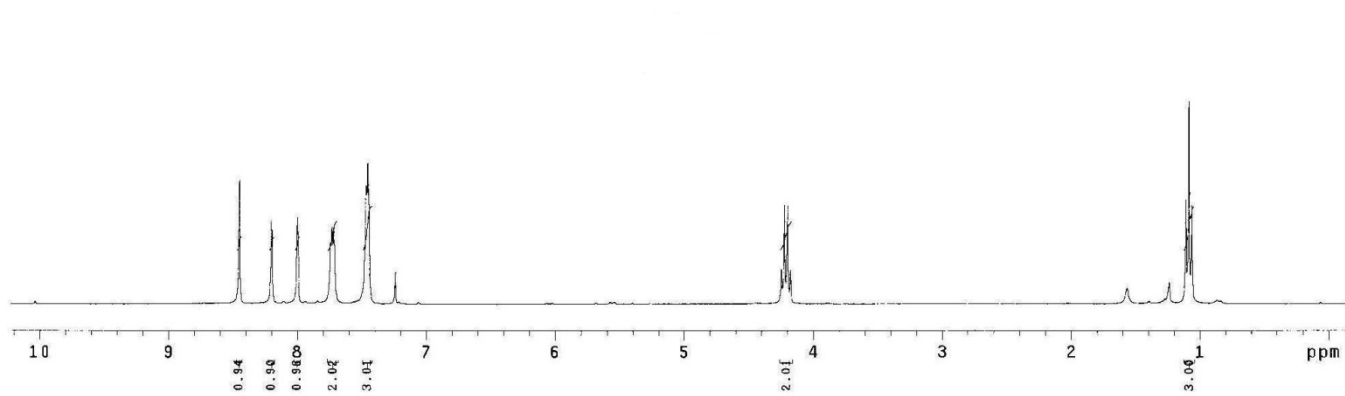

<sup>13</sup>C NMR of Compound **3q**

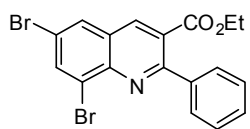

(75 MHz, CDCl<sub>3</sub>)

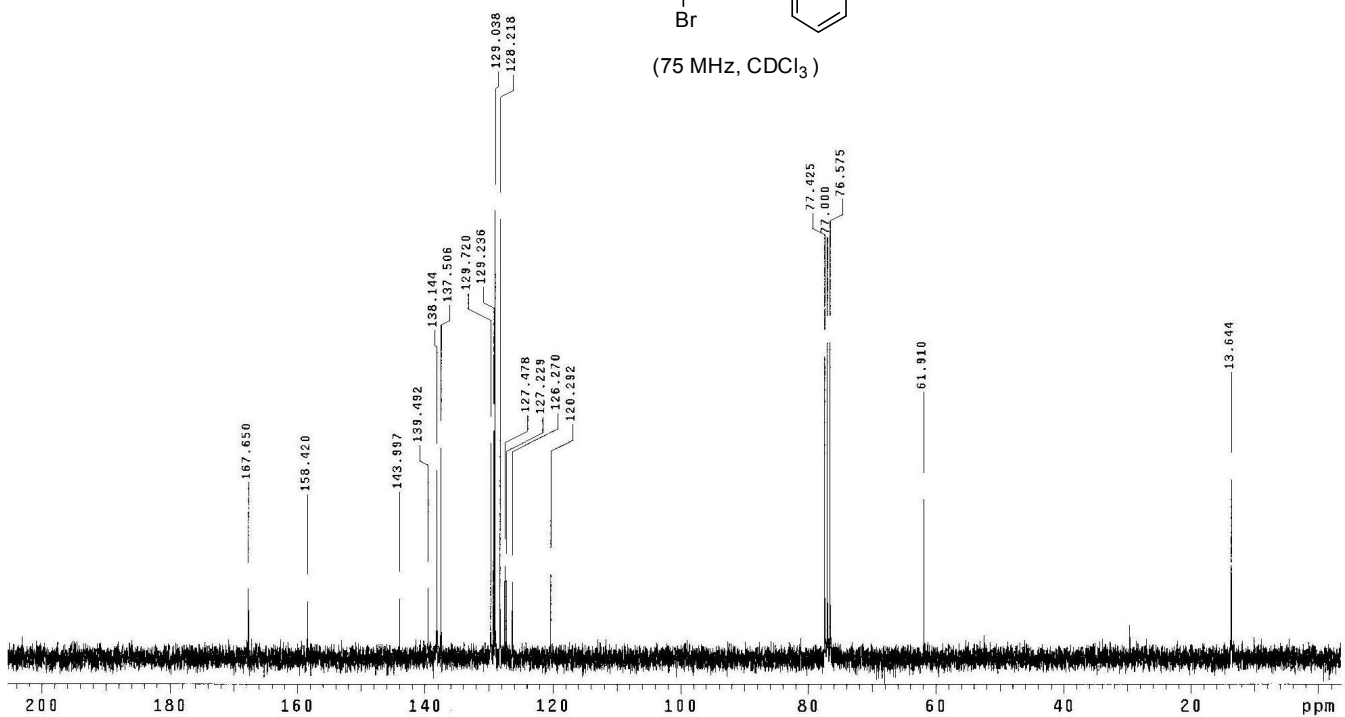

<sup>1</sup>H NMR of Compound 6

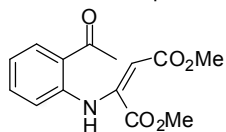

300 MHz, CDCl<sub>3</sub>

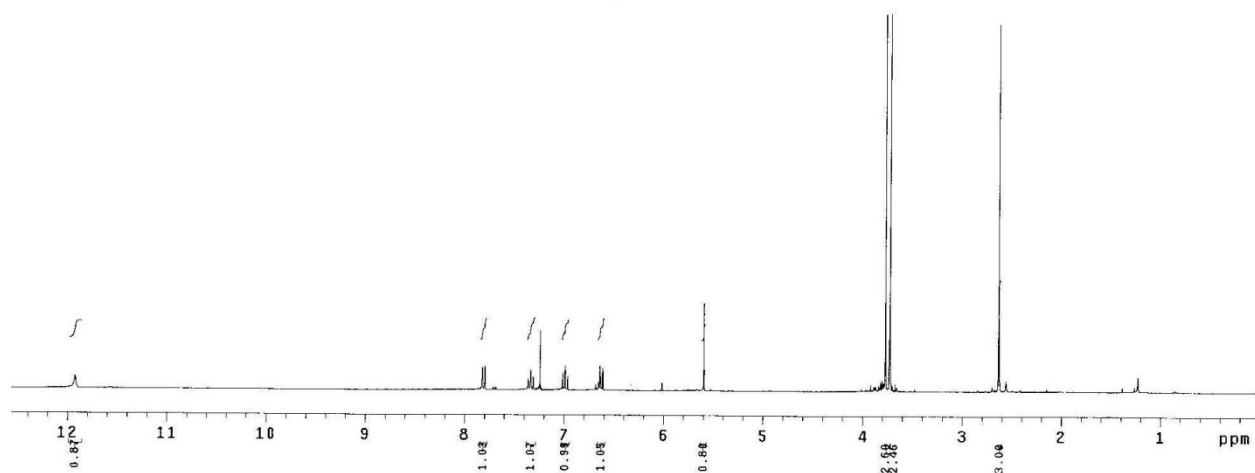

<sup>13</sup>C NMR of Compound 6

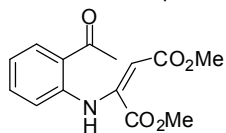

75 MHz, CDCl<sub>3</sub>

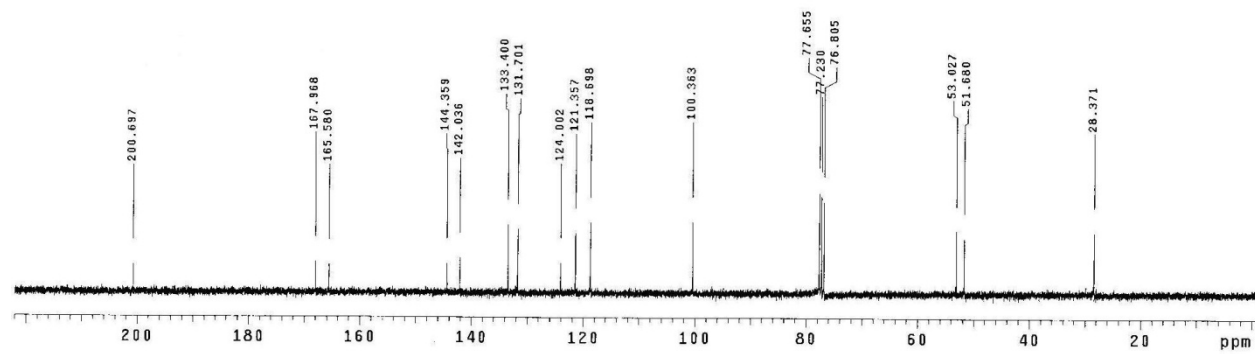

<sup>1</sup>H NMR of Compound 9

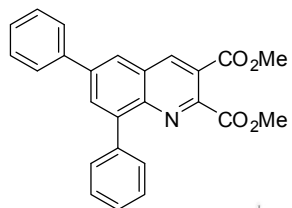

300 MHz, CDCl<sub>3</sub>

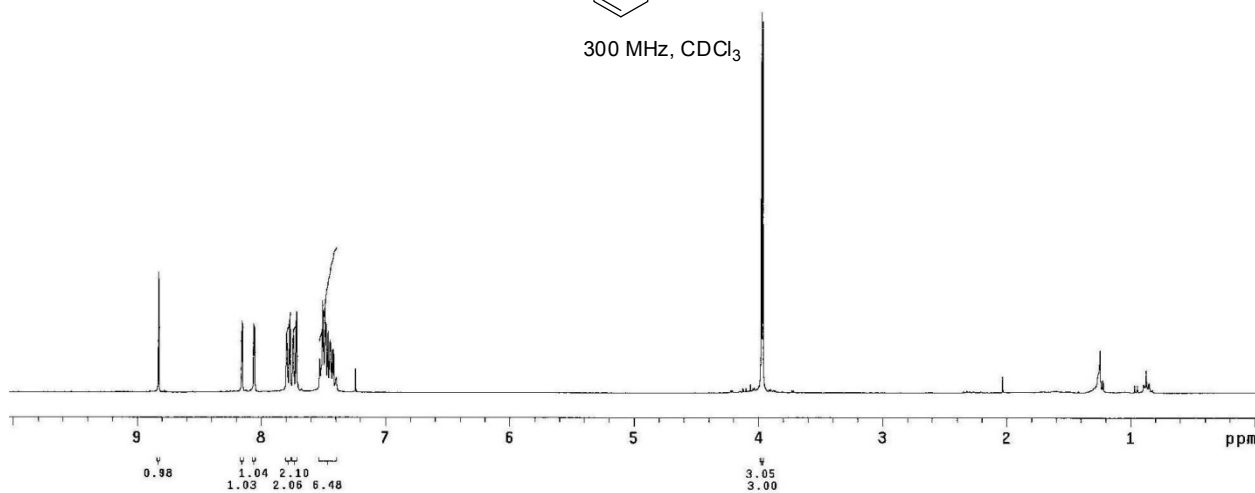

<sup>13</sup>C NMR of Compound 9

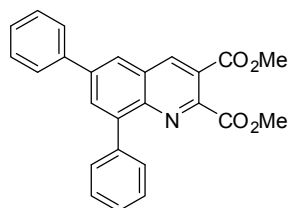

75 MHz, CDCl<sub>3</sub>

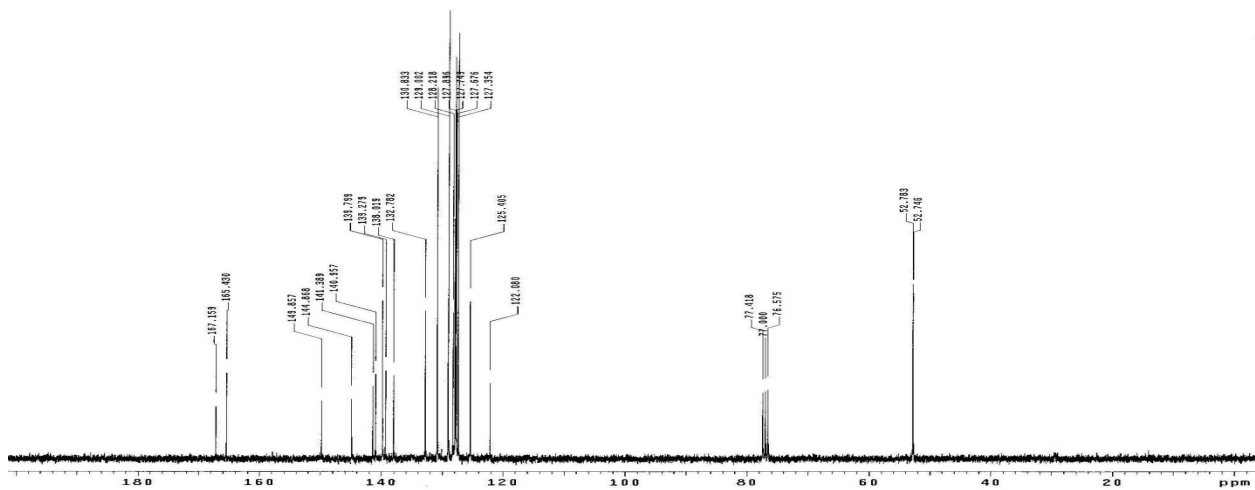

<sup>1</sup>H NMR of Compound 10

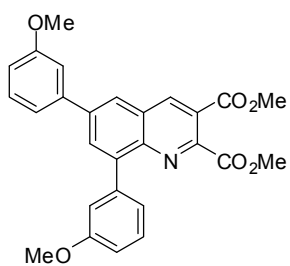

300 MHz, CDCl<sub>3</sub>

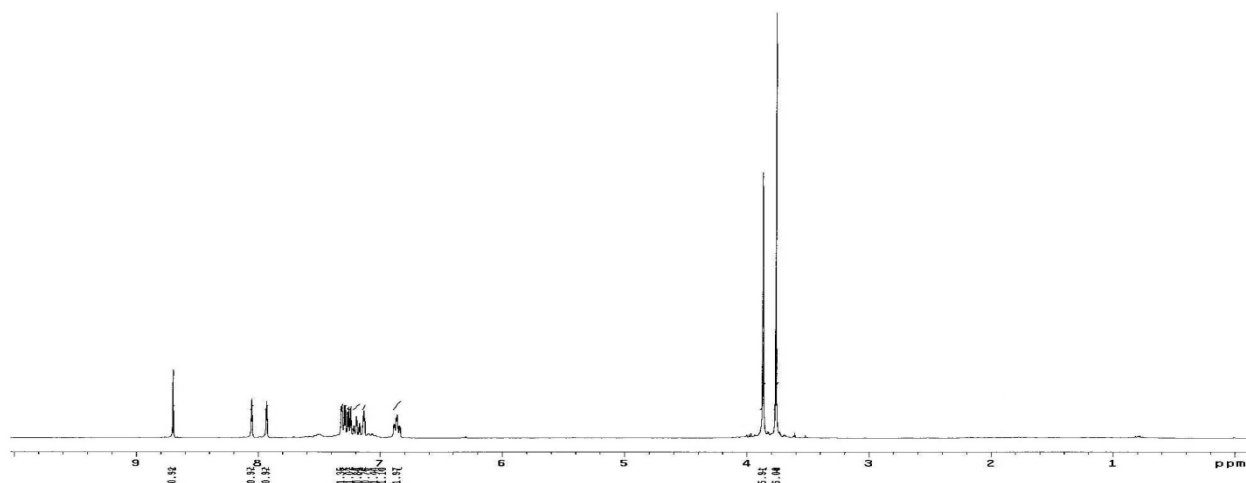

<sup>13</sup>C NMR of Compound 10

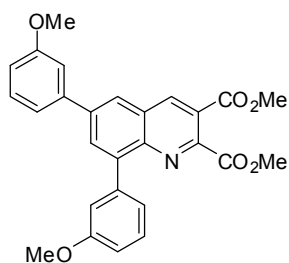

75 MHz, CDCl<sub>3</sub>

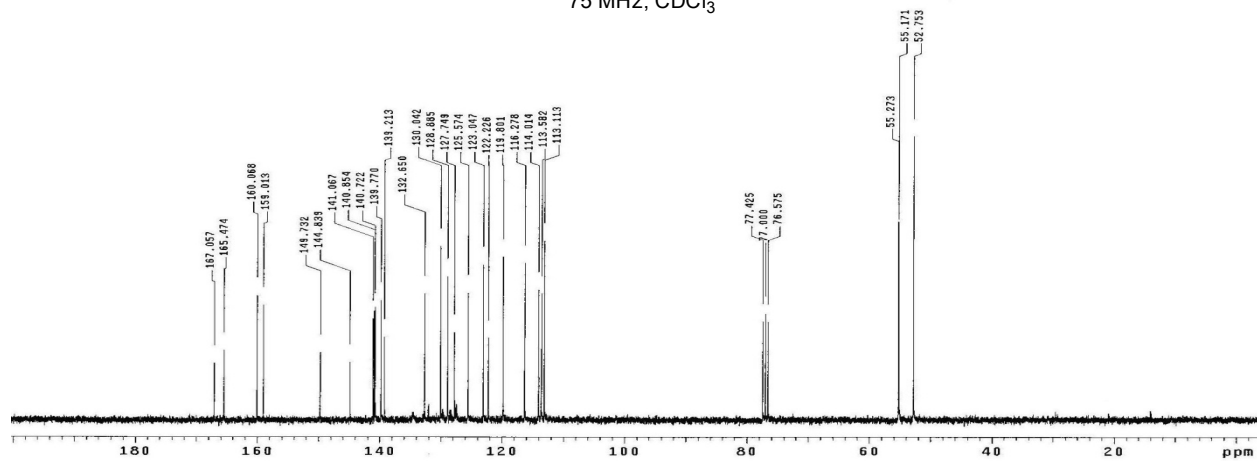

<sup>1</sup>H NMR of Compound 11

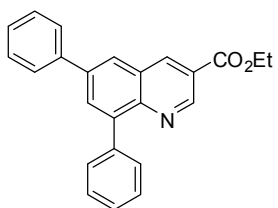

300 MHz, CDCl<sub>3</sub>

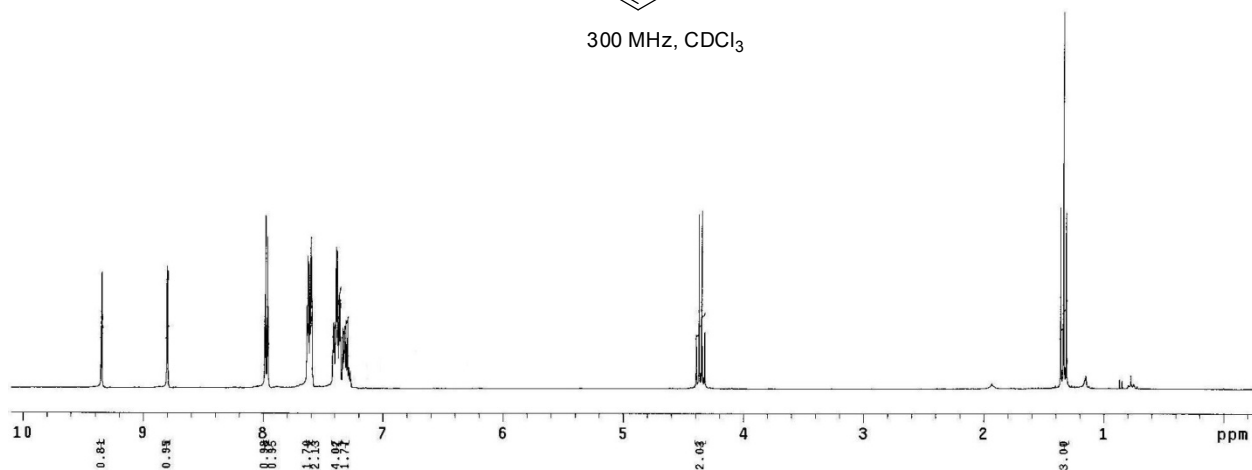

<sup>13</sup>C NMR of Compound 11

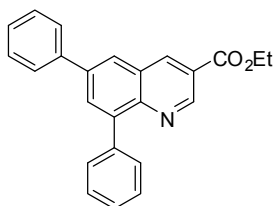

75 MHz, CDCl<sub>3</sub>

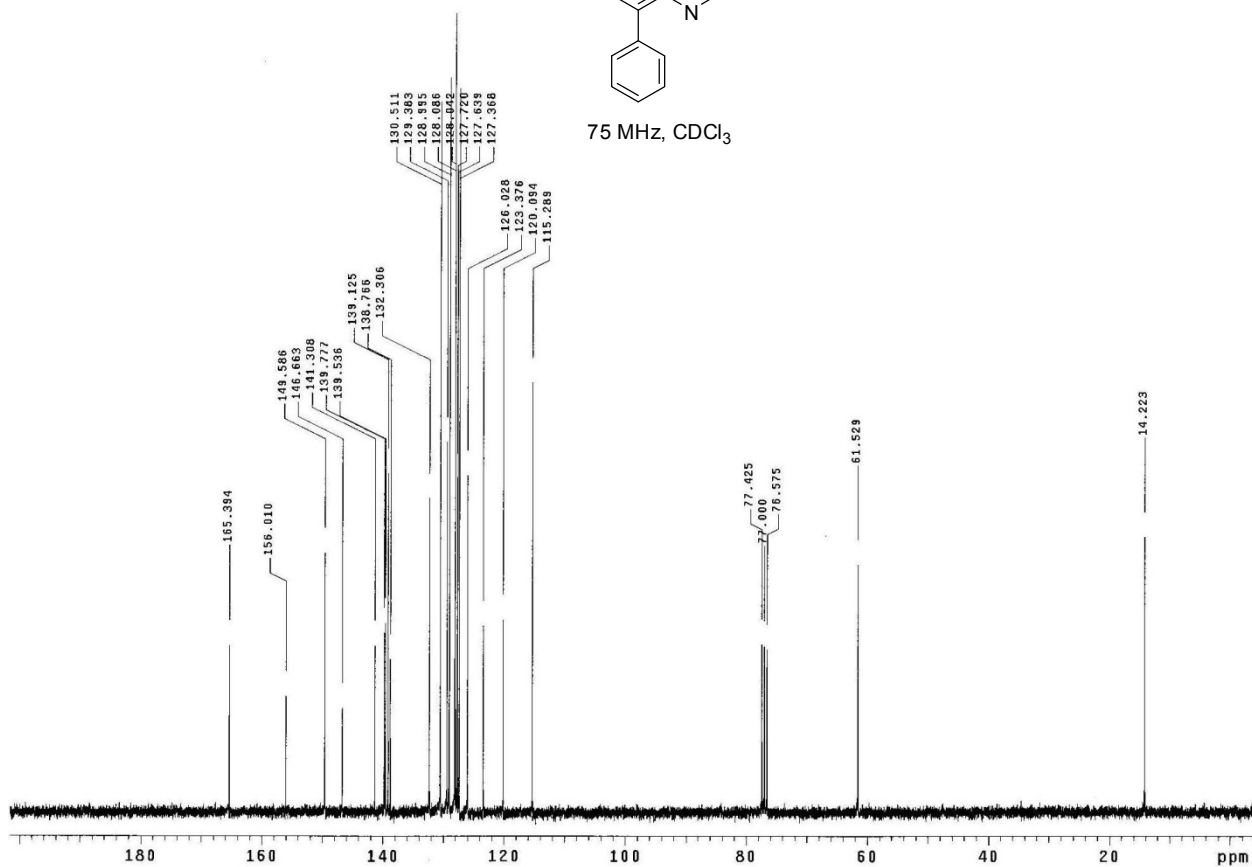

$^1\text{H}$  NMR of Compound 12

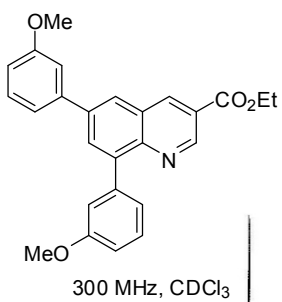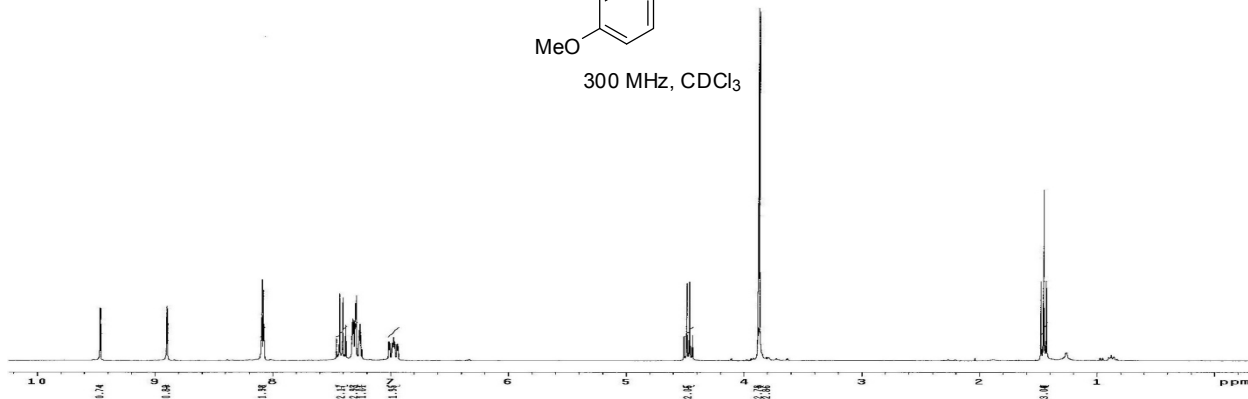

$^{13}\text{C}$  NMR of Compound 12

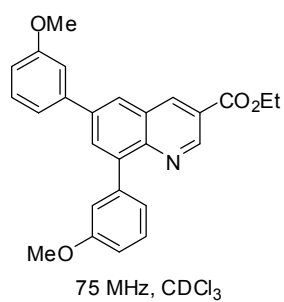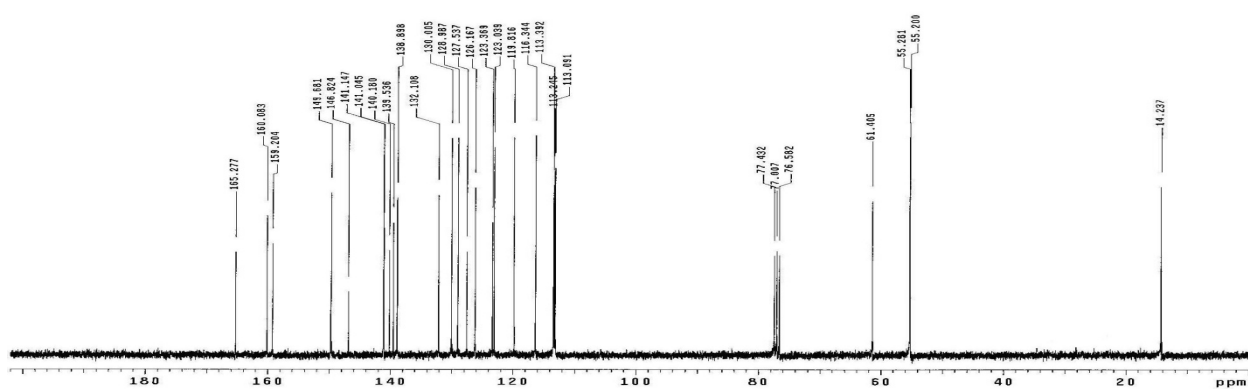

Supplement: c3ra44943b.pdf [file c3ra44943b.pdf]
